# Supplementary figures and images for: Cognitive impairment and decline in cognitively normal older adults with high amyloid-β: A meta-analysis
Source: PubMed Central journal article supplement — Alzheimers Dement (Amst). 2016 Oct 18;6:108–21. doi: 10.1016/j.dadm.2016.09.002 (PMC5315443; doi:10.1016/j.dadm.2016.09.002), 2016-10-18

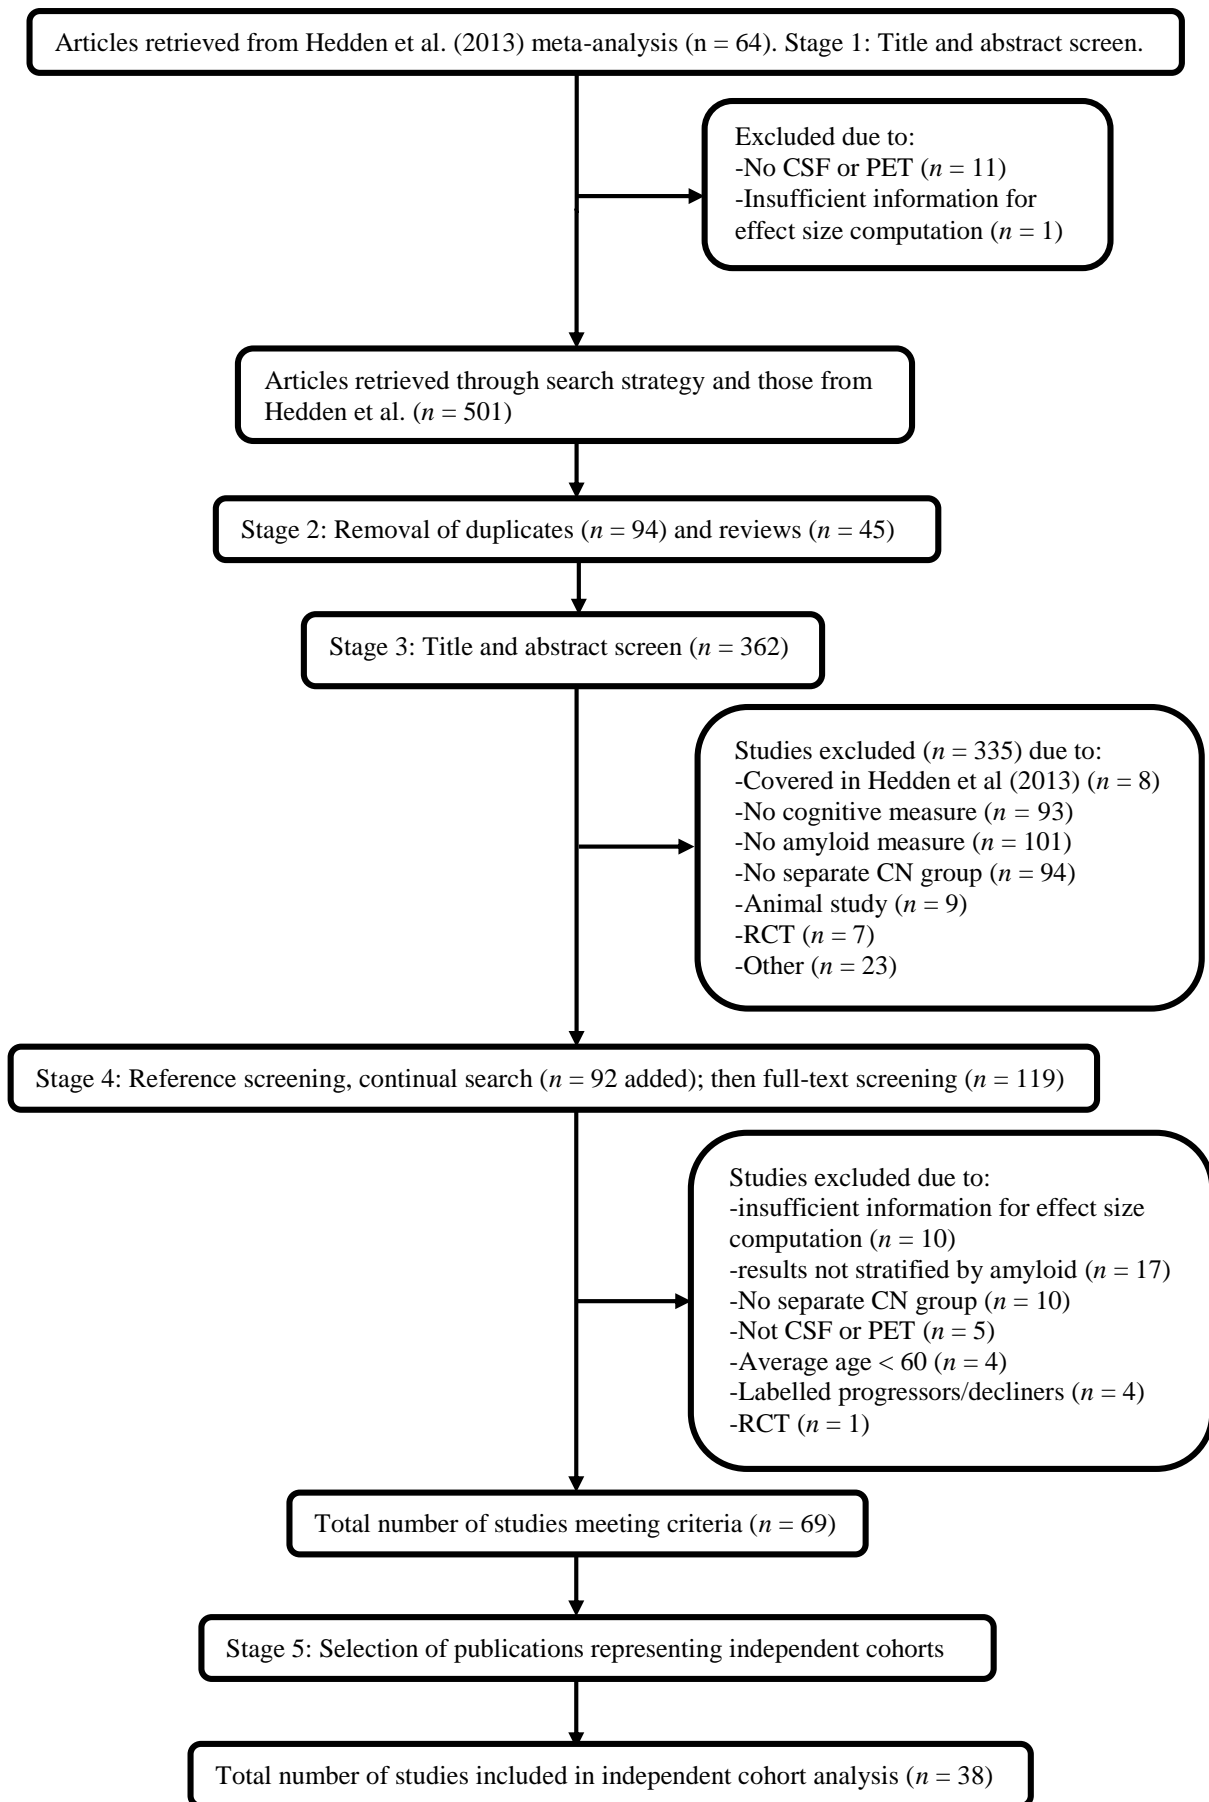

Supplementary Figure A. Flow chart of systematic review process

Supplement: mmc1.pdf [file mmc1.pdf]
